# Supplementary material for: Adherence to the Mediterranean Diet Has a Protective Role against Metabolic and DNA Damage Markers in Colorectal Cancer Patients
Source: MDPI journal article supplement (doi:10.3390/antiox11030499), 2022-03-04
Supplement: s1 [file s1]

Supplementary Table S1

|    | QUESTION                                                                                                                                                     | Assessment                     |
|----|--------------------------------------------------------------------------------------------------------------------------------------------------------------|--------------------------------|
| 1  | Do you use olive oil as the principal source of fat for cooking?                                                                                             | 1 point given: yes             |
| 2  | How much olive oil do you consume per day (including that used in frying, salads, meals eaten away from home, etc.)?                                         | 1 point given if $\geq 4$ Tbsp |
| 3  | How many servings of vegetables do you consume per day? Count garnish and side servings as $\frac{1}{2}$ point; a full serving is 200g.                      | 1 point given if $\geq 2$      |
| 4  | How many pieces of fruit (including fresh-squeezed juice) do you consume per day?                                                                            | 1 point given if $\geq 3$      |
| 5  | How many servings of red meat, hamburgers, or sausages do you consume per day? A full serving is 100-150g.                                                   | 1 point given if $< 1$         |
| 6  | How many servings (12g) of butter, margarine or cream do you consume per day?                                                                                | 1 point given if $< 1$         |
| 7  | How many carbonated and/or sugar-sweetened beverages do you consume per day?                                                                                 | 1 point given if $< 1$         |
| 8  | Do you drink wine? How much do you consume per week?                                                                                                         | 1 point given if $\geq 7$ cups |
| 9  | How many servings (150 g) of pulses do you consume per week?                                                                                                 | 1 point given if $\geq 3$      |
| 10 | How many servings of fish /seafood do you consume per week? (100-150 g o fish, 4-5 pieces or 200 g of seafood)                                               | 1 point given if $\geq 3$      |
| 11 | How many times do you consume industrially produced (not homemade) pastries (such as cookies or cake) per week?                                              | 1 point given if $< 2$         |
| 12 | How many times do you consume nuts per week? (1 serving = 30 g)                                                                                              | 1 point given if $\geq 3$      |
| 13 | Do you prefer to eat chicken, turkey or rabbit instead of beef, pork, hamburgers or sausages?                                                                | 1 point given: yes             |
| 14 | How many times per week do you consume boiled vegetables, pasta, rice, or other dishes with a sauce of tomato, garlic, onion, or leeks sautéed in olive oil? | 1 point given if $\geq 2$      |
